# Supplementary material
Source: PubMed Central journal article supplement (PMC2987317)
Supplement: ejhg2009210x1.pdf [file ejhg2009210x1.pdf]

## Supplemental Data

### **Genome-wide SNP analysis reveals no gain in power for association studies of common variants in the Finnish Saami**

Jeroen R Huyghe, Erik Fransen, Samuli Hannula, Lut Van Laer, Els Van Eyken, Elina Mäki-Torkko, Alana Lysholm-Bernacchi, Pekka Aikio, Dietrich A Stephan, Martti Sorri, Matthew J Huentelman, and Guy Van Camp

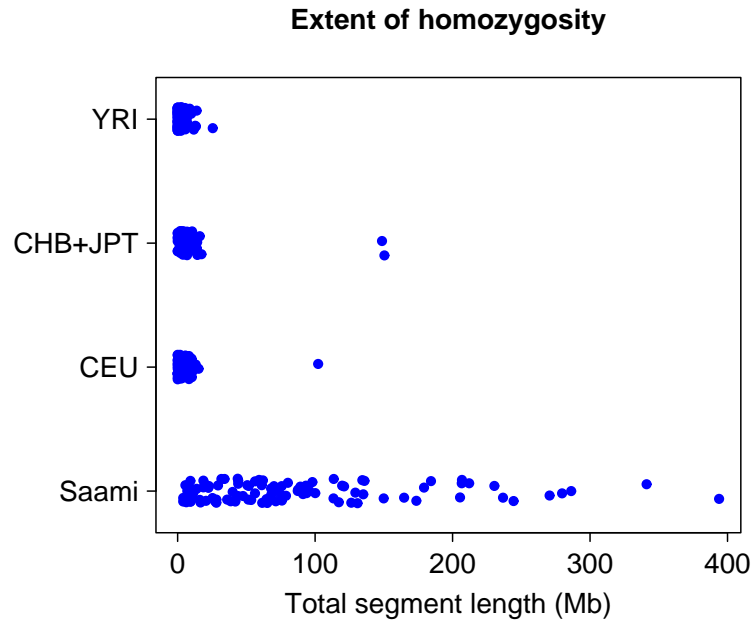

**Supplementary Figure 1: Total length of genome composed of extended regions of homozygosity for Saami and HapMap samples**

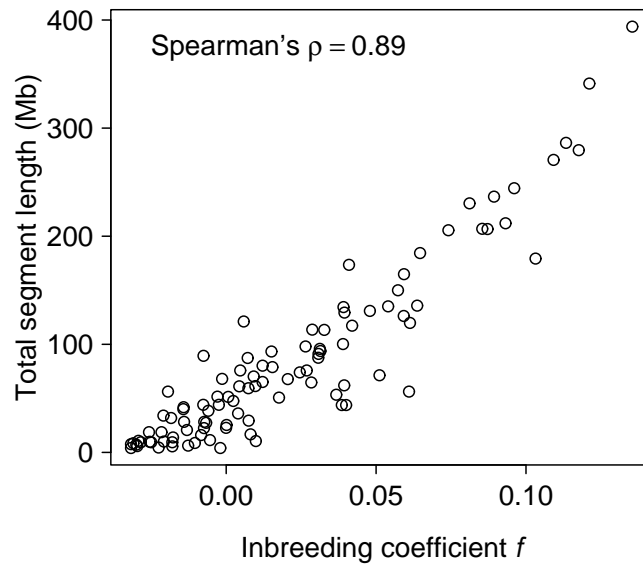

**Supplementary Figure 2: Total length of genome composed of homozygous segments plotted against inbreeding coefficients for Saami sample**

Note that inbreeding coefficient estimates were calculated using an estimator based on genome-wide data. Hence, these values are not estimates of the classically defined inbreeding coefficient, which is derived from pedigree information.
